# Supplementary material
Source: PubMed Central journal article supplement (PMC6583453)
Supplement: jamapediatr-173-29-s001.pdf [file jamapediatr-173-29-s001.pdf]

## Supplementary Online Content

O'Leary JD, Janus M, Duku E, et al. Influence of surgical procedures and general anesthesia on child development before primary school entry among matched sibling pairs. *JAMA Pediatr*. Published online November 5, 2018. doi:10.1001/jamapediatrics.2018.3662

**eTable 1.** Definition of Surgical Procedures

**eTable 2.** Adjusted Odds of Early Developmental Vulnerability, a Multiple Challenge Index, or Major Domains in the Lowest Tenth Percentile for Demographic and Health Care–Related Factors in Children Exposed to Surgery (n = 2346) From Discordant Sibling Pairs

**eTable 3.** Characteristics of All Eligible Children Available From the EDI-ICES Database (n = 187 226)

**eTable 4.** Adjusted Odds of Early Developmental Vulnerability, a Multiple Challenge Index, or Major Domains in the Lowest Tenth Percentile After Exposure to Surgery Before Primary School Entry for a Sensitivity Analysis

This supplementary material has been provided by the authors to give readers additional information about their work.

**eTable 1. Definition of Surgical Procedures**

|                                                                                                                                                                                                        |
|--------------------------------------------------------------------------------------------------------------------------------------------------------------------------------------------------------|
| <b>Excluded Canadian Classification of Health Interventions therapeutic intervention category</b>                                                                                                      |
| Compression procedures (CCI: 1.^.^34.^) (relevant CCP codes have already been excluded)                                                                                                                |
| Control of bleeding (CCI: 1.^.^13.^) not associated with operative anesthesia (CCI: 1.ZZ.11.^ or CCP: 13.59/13.99)                                                                                     |
| Dialysis interventions (CCI: 1.^.^21 or CCP: 51.95 / 66.98) or perfusion of kidney (CCI: 1.PC.16 or CCP: 67.95)                                                                                        |
| Drainage interventions (1.^.^52.^) not associated with operative anesthesia (CCI: 1.ZZ.11.^ or CCP: 13.59/13.99) <sup>a</sup>                                                                          |
| Dressing interventions (1.^.^14.^)                                                                                                                                                                     |
| Exercise interventions (CCI: 1..^^.02.^)                                                                                                                                                               |
| Hyperthermy interventions (CCI: 1..^^.07.^)                                                                                                                                                            |
| Hypothermy interventions (CCI: 1..^^.06.^)                                                                                                                                                             |
| Immobilization interventions (1.^.^03.^) not associated with operative anesthesia (CCI: 1.ZZ.11.^ or CCP: 13.59/13.99)                                                                                 |
| Implantation or removal of internal device (per-orifice), stomach (CCI: 1.NF.53.CA and 1.NF.55.CA), artery (CCI: 1.KV.53.^ and 1.KV.55.^), vein (CCI: 1.KX.53.^ and 1.KX.55.^)                         |
| Insertion of simple intravenous line (CCI: 1.KX.53.^ or CCP: 50.93 or 50.96)                                                                                                                           |
| Management (CCI: 1.^.^54.^ or 1.^.^38.^) interventions                                                                                                                                                 |
| Manipulation interventions (CCI: 1..^^.05.^)                                                                                                                                                           |
| Mobilization interventions (CCI: 1..^^.04.^)                                                                                                                                                           |
| Newborn surgical procedures routinely performed without general anesthesia, specifically tongue tie (CCI: 1.FJ.72 or CCP: 37.91) or circumcision (CCI: 1.QD.89 or CCP: 76.00) in 0-90 day age category |
| Stimulation (CCI: 1.^.^09.^ or CCP: 17.92, 25.99, 90.41, 90.42, 90.44, 90.46, 90.49)                                                                                                                   |
| Therapeutic interventions on the digestive system NEC (CCI: 1.OZ.^.^)                                                                                                                                  |
| Therapeutic interventions of the respiratory system (CCI: 1.GZ.^.^), including replacement of endotracheal tube (1.GJ.50.CA-NG)                                                                        |
| <b>Excluded Canadian Classification of Health Interventions therapeutic intervention category</b>                                                                                                      |
| Therapeutic interventions of the skin, subcutaneous tissue and breast (CCI: 1.Y.^.^.^ or CCP: 98.^) not associated with operative anesthesia (CCI: 1.ZZ.11.^ or CCP: 13.59/13.99)                      |
| Therapeutic interventions of the tooth or root of tooth (CCI: 1.FE.^.^./ 1.FF.^.^ or CCP: 35.^ / 36.^) not associated with operative anesthesia (CCI: 1.ZZ.11.^ or CCP: 13.59/13.99)                   |
| Therapy interventions (CCI: 1.^.^12.^)                                                                                                                                                                 |
| Transfusion (CCI: 1.LZ.19.^) or apheresis (CCI: 1.LZ.20.^)                                                                                                                                             |

Abbreviations: CCI, Canadian Classification of Health Interventions; CCP, Canadian Classification of Diagnostic, Therapeutic, and Surgical Procedure

<sup>a</sup>Neurosurgical drainage procedures are excluded by these codes

Eligible surgical procedures were defined by Canadian Classification of Health Interventions (CCI) therapeutic intervention categories 1.AA.^.^ - 1.YZ.^.^ or Canadian Classification of Diagnostic, Therapeutic, and Surgical Procedure (CCP) codes 14.^ to 98.^ in any incode field of the Discharge Abstract Database (DAD) and Same Day Surgery (SDS) database for each episode of care, except the following therapeutic interventions (when not indicated, relevant CCP codes have already been excluded).

**eTable 2.** Adjusted Odds of Early Developmental Vulnerability, a Multiple Challenge Index, or Major Domains in the Lowest Tenth Percentile for Demographic and Health Care–Related Factors in Children Exposed to Surgery (n = 2346) From Discordant Sibling Pairs

| <b>EDI Outcomes</b>                       | <b>Odds Ratio</b> | <b>95% Confidence Interval</b> | <b>P value</b> |
|-------------------------------------------|-------------------|--------------------------------|----------------|
| <b>Early developmental vulnerability</b>  |                   |                                |                |
| Age at EDI completion                     | 0.36              | 0.26 to 0.50                   | <.0001         |
| Female                                    | 0.53              | 0.43 to 0.66                   | <.0001         |
| Mother's age at birth                     | 0.96              | 0.94 to 0.97                   | <.0001         |
| Eldest sibling status                     | 0.88              | 0.71 to 1.09                   | 0.2            |
| Age at exposure, <2 vs. ≥ 2 years         | 0.86              | 0.69 to 1.06                   | 0.2            |
| Number of exposures, 1 vs. 2+             | 0.92              | 0.70 to 1.21                   | 0.6            |
| OHIP basic units, <8 vs. ≥8               | 0.88              | 0.53 to 1.48                   | 0.6            |
| <b>Multiple challenge index</b>           |                   |                                |                |
| Age at EDI completion                     | 0.50              | 0.22 to 1.17                   | 0.1            |
| Female                                    | 0.39              | 0.20 to 0.73                   | 0.003          |
| Mother's age at birth                     | 0.96              | 0.91 to 1.01                   | 0.1            |
| Eldest sibling status                     | 0.75              | 0.45 to 1.26                   | 0.3            |
| Age at exposure, <2 vs. ≥ 2 years         | 0.56              | 0.32 to 1.00                   | 0.05           |
| Number of exposures, 1 vs. 2+             | 0.82              | 0.42 to 1.57                   | 0.5            |
| OHIP basic units, <8 vs. ≥8               | 1.29              | 0.39 to 4.28                   | 0.7            |
| <i>Major EDI Domains:</i>                 |                   |                                |                |
| <b>Language and cognitive development</b> |                   |                                |                |
| Age at EDI completion                     | 0.27              | 0.15 to 0.49                   | <.0001         |
| Female                                    | 0.38              | 0.24 to 0.59                   | <.0001         |
| Mother's age at birth                     | 0.97              | 0.93 to 1.01                   | 0.09           |
| Eldest sibling status                     | 1.03              | 0.71 to 1.49                   | 0.9            |
| Age at exposure, <2 vs. ≥ 2 years         | 0.73              | 0.50 to 1.07                   | 0.1            |
| Number of exposures, 1 vs. 2+             | 1.09              | 0.67 to 1.78                   | 0.7            |
| OHIP basic units, <8 vs. ≥8               | 0.95              | 0.37 to 2.42                   | 0.9            |
| <b>Physical well-being</b>                |                   |                                |                |
| Age at EDI completion                     | 0.44              | 0.29 to 0.69                   | 0.0003         |
| <b>EDI Outcomes</b>                       |                   |                                |                |
| Female                                    | 0.67              | 0.50 to 0.88                   | 0.005          |
| Mother's age at birth                     | 0.94              | 0.91 to 0.97                   | <.0001         |
| Eldest sibling status                     | 0.71              | 0.54 to 0.94                   | 0.02           |
| Age at exposure, <2 vs. ≥ 2 years         | 0.92              | 0.70 to 1.21                   | 0.5            |
| Number of exposures, 1 vs. 2+             | 0.94              | 0.66 to 1.33                   | 0.7            |
| OHIP basic units, <8 vs. ≥8               | 0.75              | 0.37 to 1.53                   | 0.4            |
| <b>Social competence</b>                  |                   |                                |                |
| Age at EDI completion                     | 0.33              | 0.19 to 0.58                   | 0.0001         |
| Female                                    | 0.43              | 0.29 to 0.64                   | <.0001         |
| Mother's age at birth                     | 0.95              | 0.92 to 0.99                   | 0.007          |
| Eldest sibling status                     | 0.89              | 0.63 to 1.26                   | 0.5            |
| Age at exposure, <2 vs. ≥ 2 years         | 0.63              | 0.44 to 0.91                   | 0.01           |
| Number of exposures, 1 vs. 2+             | 0.80              | 0.51 to 1.23                   | 0.3            |

|                                            |      |              |        |
|--------------------------------------------|------|--------------|--------|
| OHIP basic units, <8 vs. ≥8                | 0.82 | 0.33 to 2.09 | 0.7    |
| <b>Emotional maturity</b>                  |      |              |        |
| Age at EDI completion                      | 0.52 | 0.32 to 0.85 | 0.009  |
| Female                                     | 0.38 | 0.26 to 0.55 | <.0001 |
| Mother's age at birth                      | 0.99 | 0.96 to 1.02 | 0.6    |
| Eldest sibling status                      | 0.90 | 0.66 to 1.23 | 0.5    |
| Age at exposure, <2 vs. ≥ 2 years          | 0.82 | 0.60 to 1.13 | 0.2    |
| Number of exposures, 1 vs. 2+              | 0.93 | 0.62 to 1.39 | 0.7    |
| OHIP basic units, <8 vs. ≥8                | 1.04 | 0.49 to 2.21 | 0.9    |
| <b>Communication and general knowledge</b> |      |              |        |
| Age at EDI completion                      | 0.35 | 0.21 to 0.57 | <.0001 |
| Female                                     | 0.35 | 0.24 to 0.51 | <.0001 |
| Mother's age at birth                      | 0.95 | 0.92 to 0.98 | 0.003  |
| Eldest sibling status                      | 0.82 | 0.60 to 1.13 | 0.2    |
| Age at exposure, <2 vs. ≥ 2 years          | 0.82 | 0.59 to 1.13 | 0.2    |
| Number of exposures, 1 vs. 2+              | 0.81 | 0.55 to 1.20 | 0.3    |
| OHIP basic units, <8 vs. ≥8                | 1.03 | 0.48 to 2.19 | 1.0    |

Abbreviations: EDI, Early Development Instrument; OHIP, Ontario Health Insurance Plan

**eTable 3.** Characteristics of All Eligible Children Available From the EDI-ICES Database (n = 187 226)

|                                                         | <b>No surgery</b>  | <b>Surgery</b>    |
|---------------------------------------------------------|--------------------|-------------------|
|                                                         | <b>N = 160,021</b> | <b>N = 27,205</b> |
| Age at EDI completion, <i>mean ± SD</i>                 | 5.68 ± 0.29        | 5.71 ± 0.30       |
| Male, <i>No. (%)</i>                                    | 67,544 (42.2)      | 17,432 (64.1)     |
| Newborn's gestation weeks at delivery, <i>mean ± SD</i> | 39.16 ± 1.75       | 38.97 ± 1.96      |
| Multiple births, <i>No. (%)</i>                         | 1,426 (0.9)        | 280 (1.0)         |
| Neighbourhood income quintile, <i>No. (%)</i>           |                    |                   |
| Missing                                                 | 707 (0.4)          | 103 (0.4)         |
| 1                                                       | 26,366 (16.5)      | 4,122 (15.2)      |
| 2                                                       | 29,643 (18.5)      | 4,900 (18.0)      |
| 3                                                       | 34,263 (21.4)      | 5,779 (21.2)      |
| 4                                                       | 37,143 (23.2)      | 6,637 (24.4)      |
| 5                                                       | 31,899 (19.9)      | 5,664 (20.8)      |
| Aboriginal, <i>No. (%)</i>                              | 1,553 (1.0)        | 239 (0.9)         |
| Rural home location, <i>No. (%)</i>                     | 16,548 (10.3)      | 3,134 (11.5)      |
| Mother's age at birth, <i>median (IQR)</i>              | 30 (27-34)         | 30 (26-33)        |
| Eldest child, <i>No. (%)</i>                            | 9,295 (5.8)        | 1,685 (6.2)       |

Abbreviations: EDI, Early Development Instrument; SD, standard deviation; IQR, interquartile range

**eTable 4.** Adjusted Odds of Early Developmental Vulnerability, a Multiple Challenge Index, or Major Domains in the Lowest Tenth Percentile After Exposure to Surgery Before Primary School Entry for a Sensitivity Analysis

| <b>EDI Outcomes</b>                        | <b>Odds Ratio</b> | <b>95% Confidence Interval</b> | <b>P value</b> |
|--------------------------------------------|-------------------|--------------------------------|----------------|
| Overall, early developmental vulnerability | 1.01              | 0.92 to 1.11                   | 0.8            |
| Multiple challenge index                   | 1.02              | 0.80 to 1.31                   | 0.9            |
| Major EDI Domains:                         |                   |                                |                |
| Language and cognitive development         | 0.91              | 0.77 to 1.08                   | 0.3            |
| Physical well-being <sup>a</sup>           | 1.05              | 0.93 to 1.20                   | 0.4            |
| Social competence <sup>a</sup>             | 0.96              | 0.82 to 1.12                   | 0.6            |
| Emotional maturity                         | 0.94              | 0.82 to 1.09                   | 0.4            |
| Communication and general knowledge        | 0.90              | 0.78 to 1.04                   | 0.2            |

<sup>a</sup>Not adjusted for eldest sibling status due to lack of model convergence

Abbreviations: EDI, Early Development Instrument

Includes children who had Early Development Instrument-recorded behavioral, learning, or developmental problems (n = 11,220 sibling-pairs).
